# Supplementary material
Source: HighWire-hosted journal article supplement (doi:10.1101/rna.079784.123)
Supplement: Supplemental_TableS1.docx [file Supplemental_TableS1.docx]

**Table S1.** Sequence information of Apta_1137 and Apta_1131

| **Apta_index** | **Sequence** | **Affinity**  **(μM)** |
| --- | --- | --- |
| Apta_1137 | GCCGAGATTGCACTTACTATCTCAAGAAGAGTAGTAAGAGGAGTGGGTGGTTATGAGTAAGTTGTATGTGGTAATTGAATAAGCTGGTATGCGC | 0.406 |
| Apta_1131 | GCCGAGATTGCACTTACTATCTCAAGAAGGGTAGTAAGAGGAGTGGGTGATTATGGGTAAGTTGTATGAGGTAATTGAATAAGCTGGTATGCGC | 1.968 |
