# Supplementary material
Source: HighWire-hosted journal article supplement (doi:10.1101/rna.079784.123)

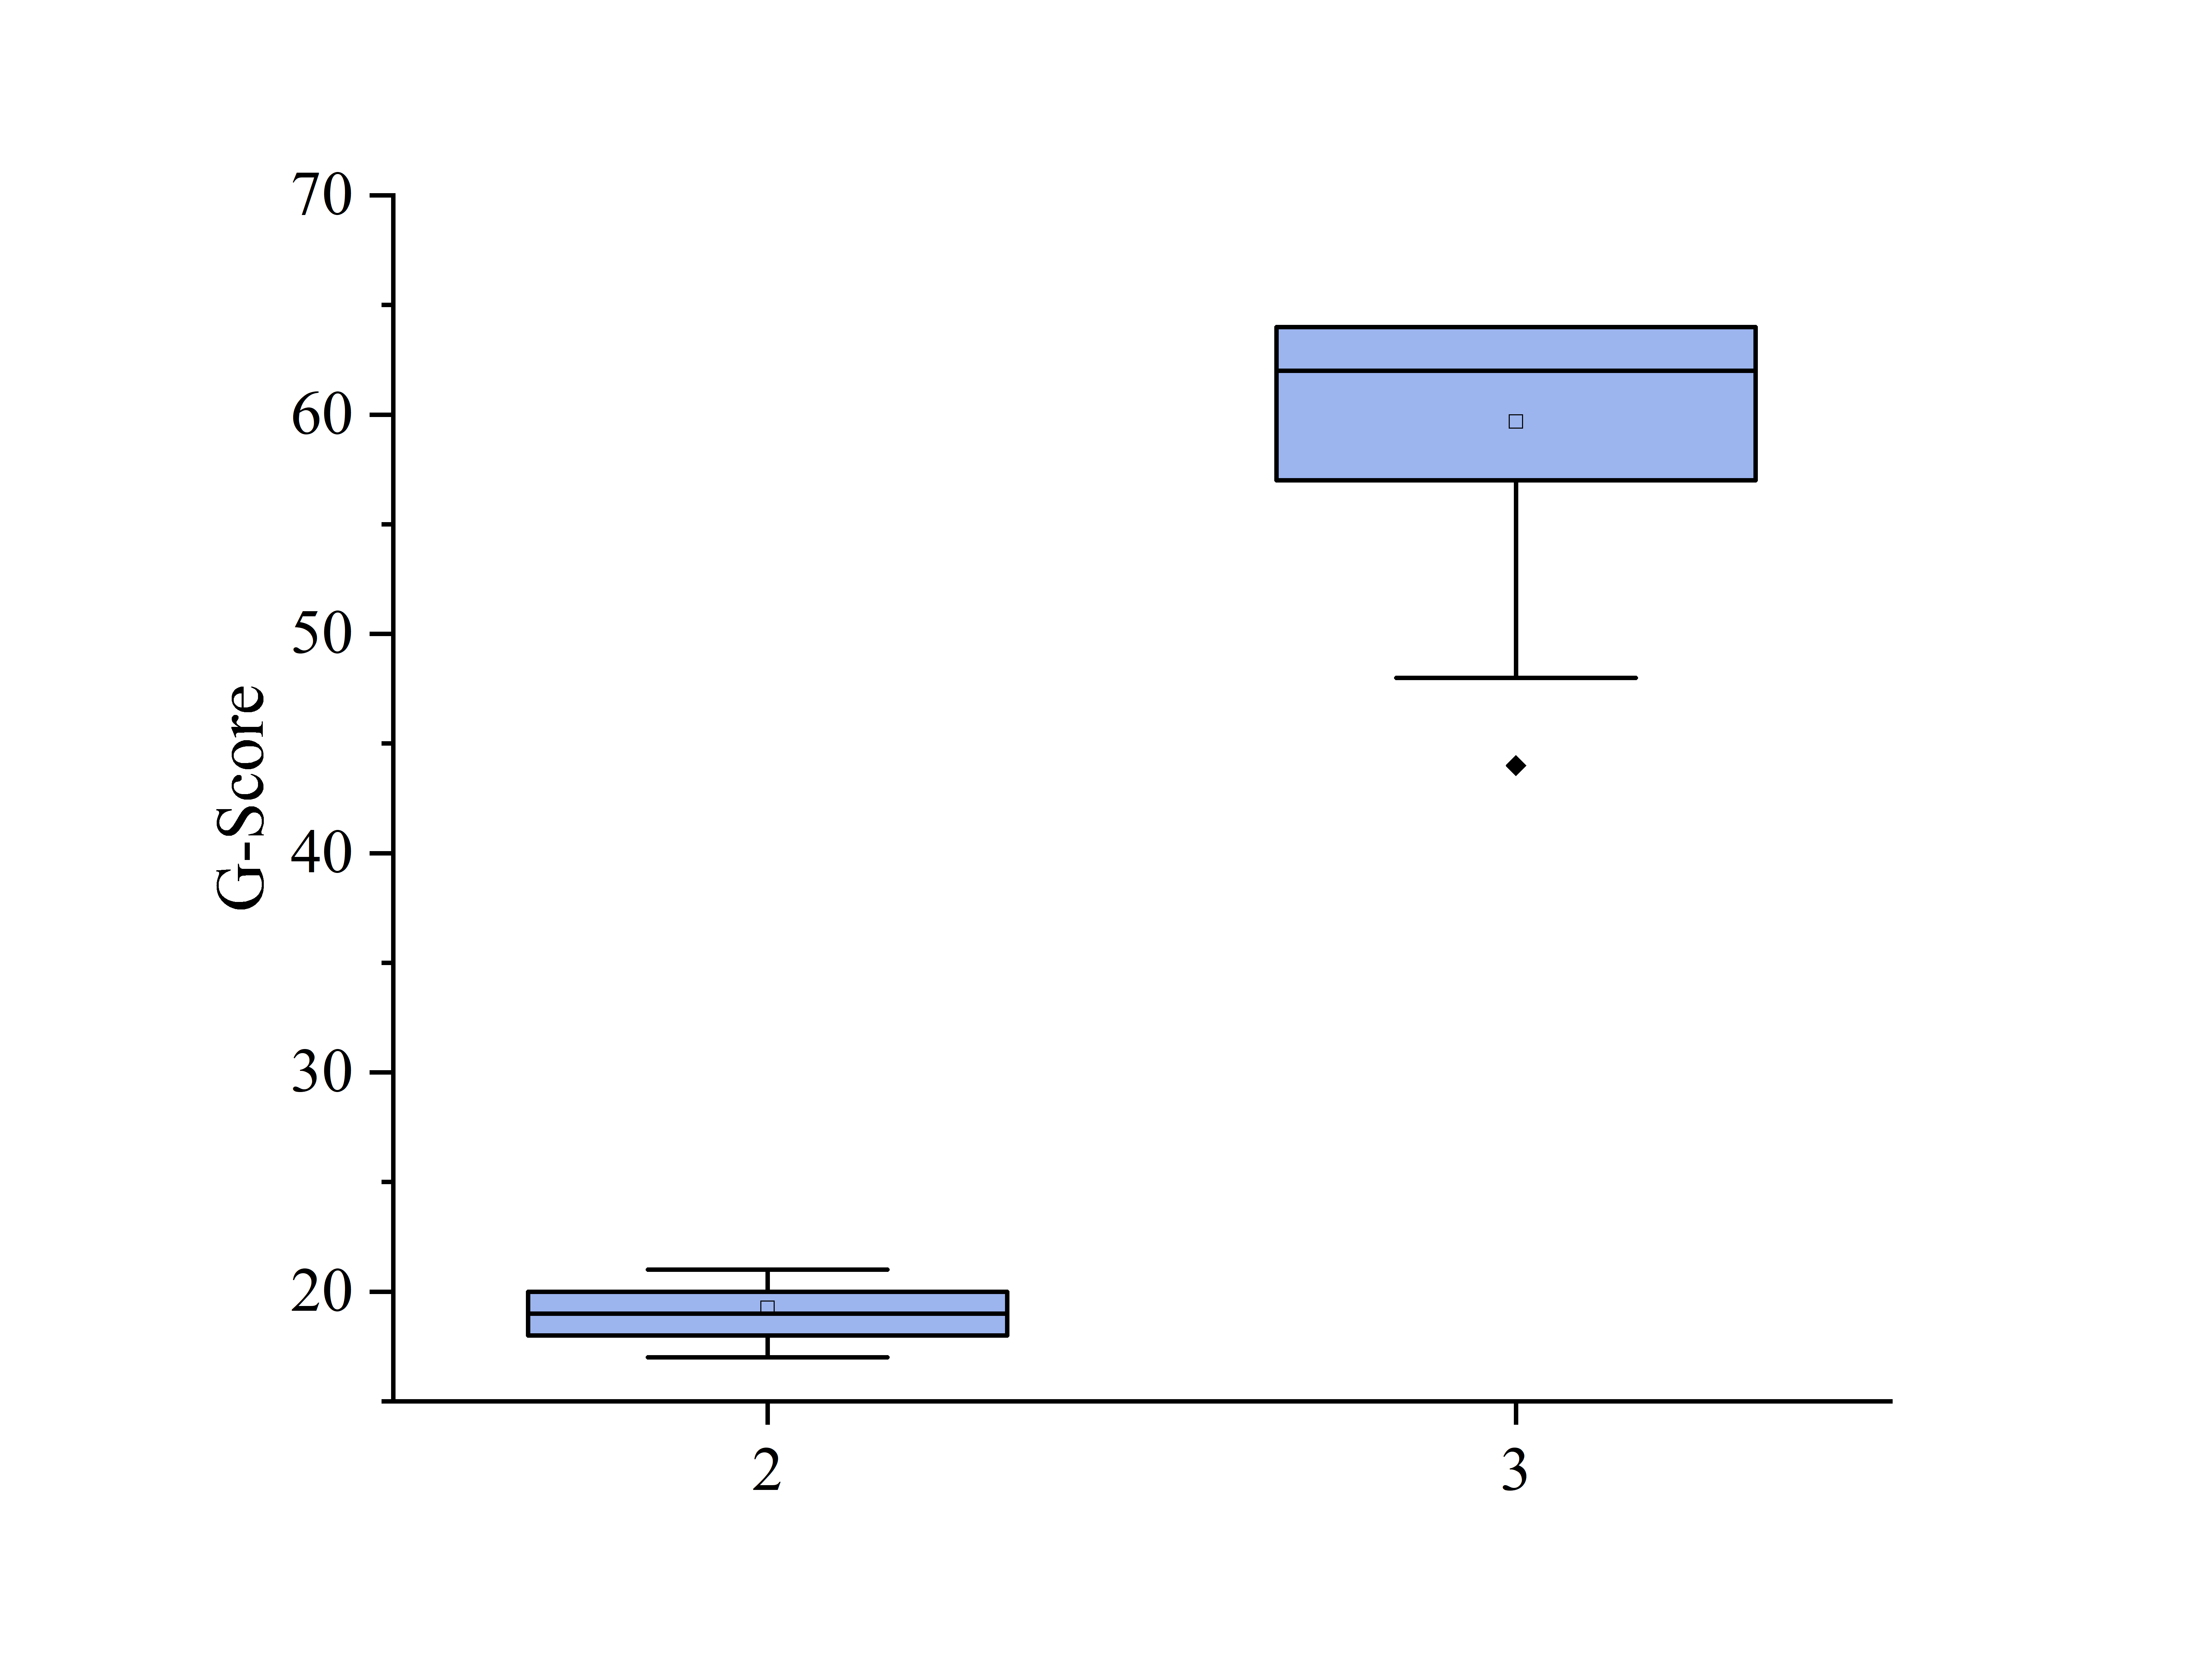


**Fig. S1.** Distribution of G-score with different number of G-quadruplex.

Supplement: Supplemental_Fig_S1.docx [file Supplemental_Fig_S1.docx]

**
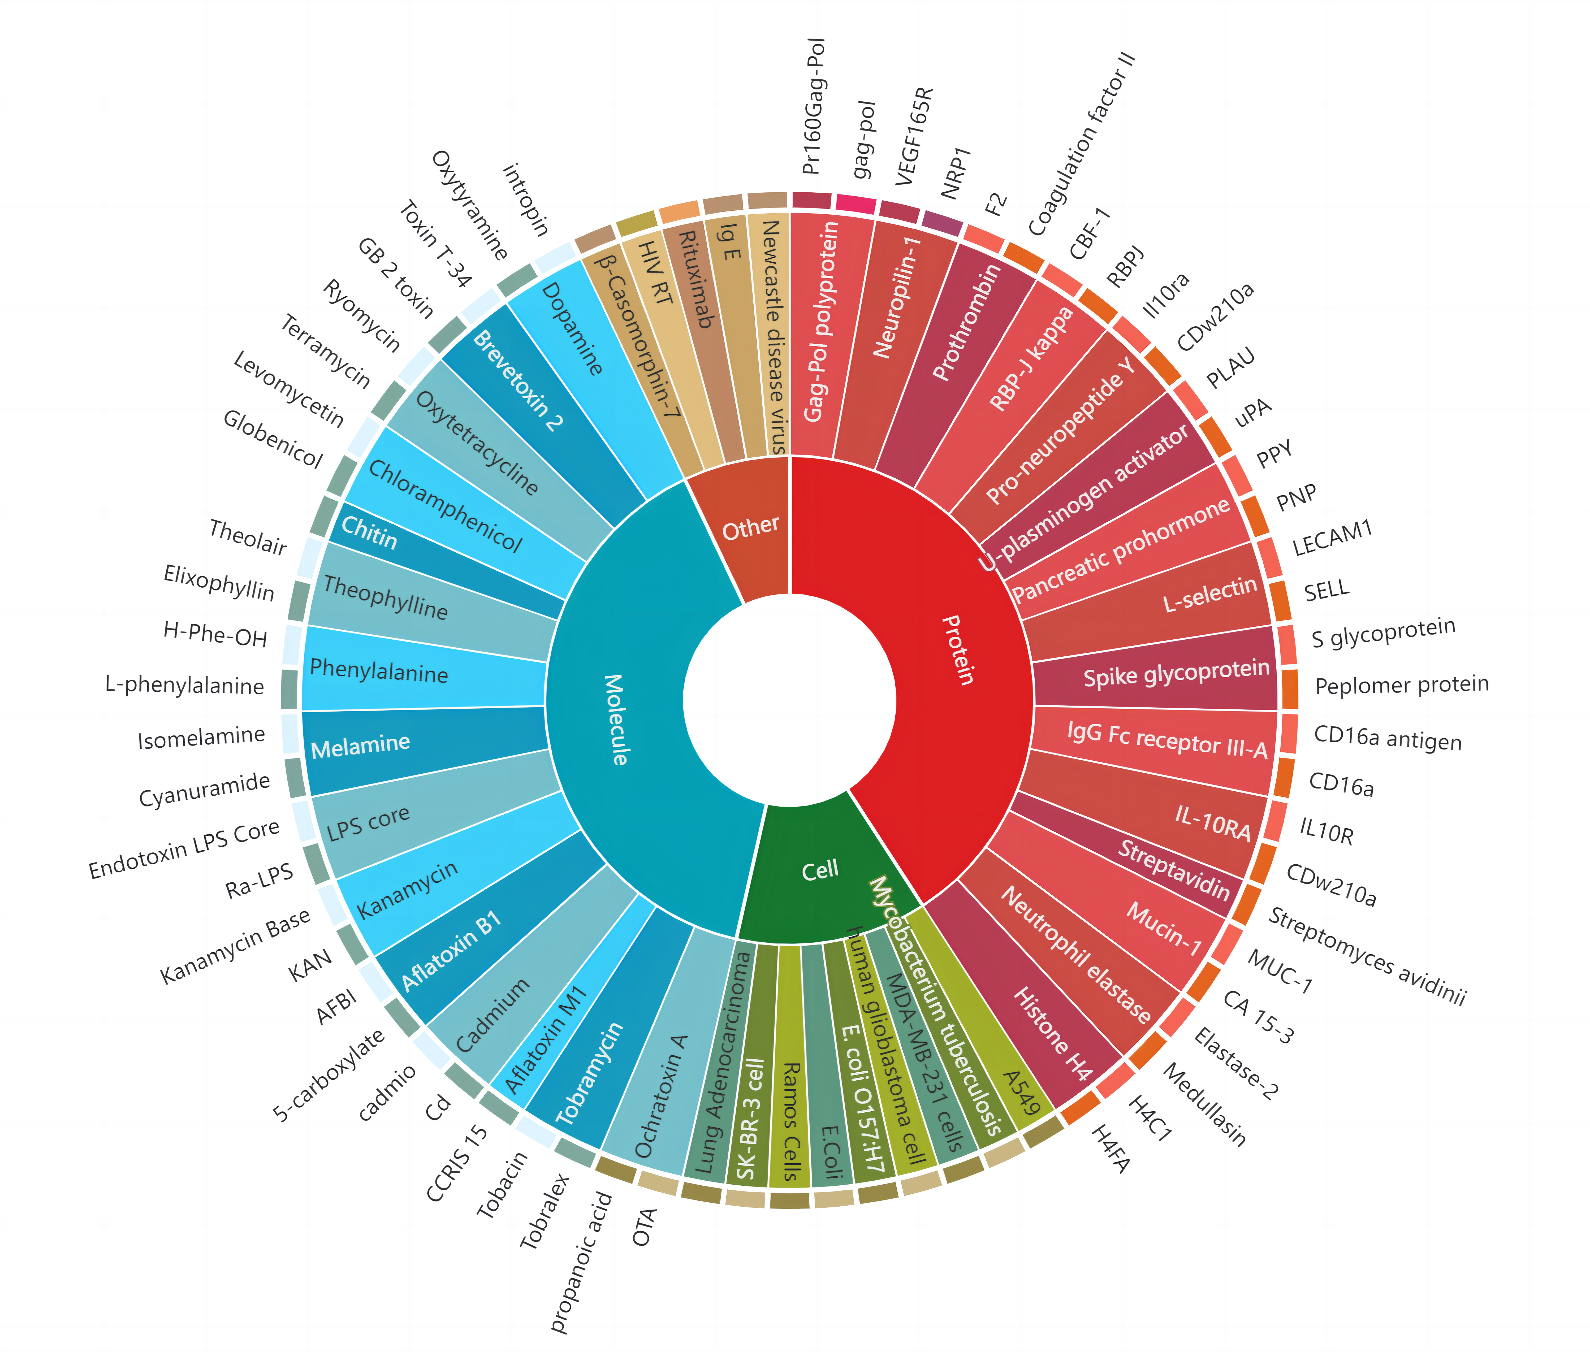
**

**Fig. S2**.Different categories of targets with the highest number of interactions with aptamers.

Supplement: Supplemental_Fig_S2.docx [file Supplemental_Fig_S2.docx]

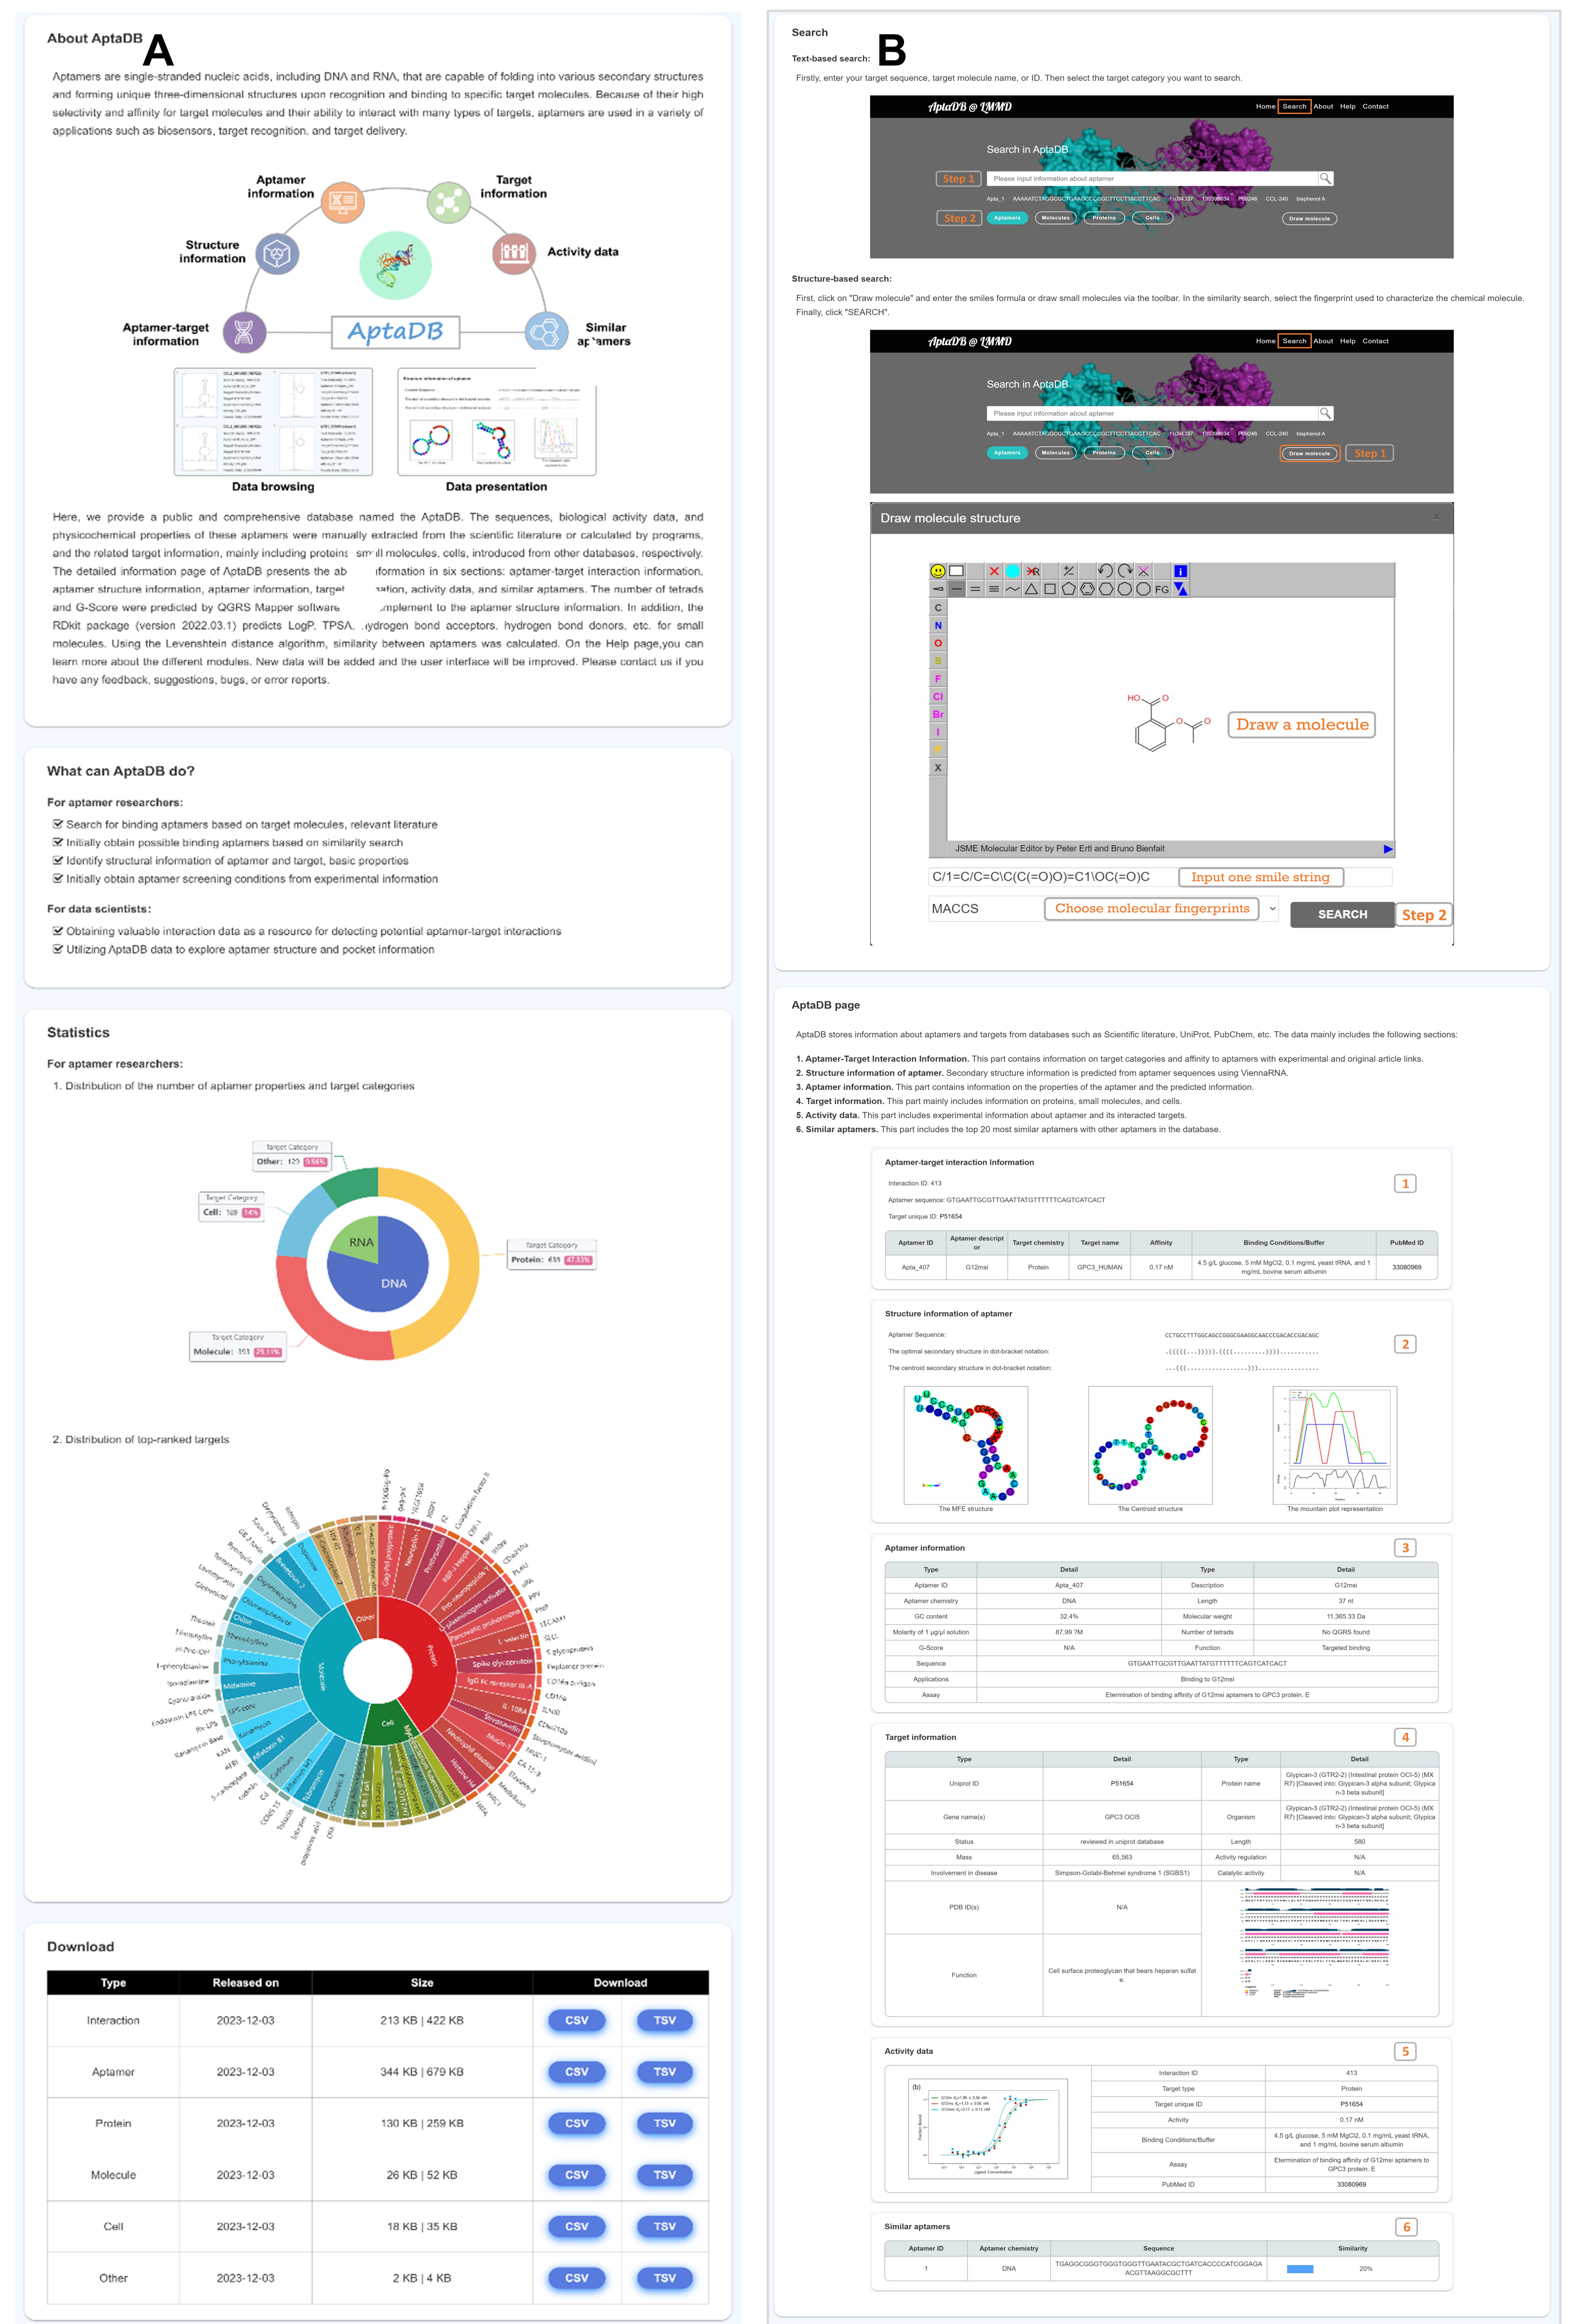


**Fig. S3.** The help and about pages of AptaDB. A) About page. B) Help page.

Supplement: Supplemental_Fig_S3.docx [file Supplemental_Fig_S3.docx]

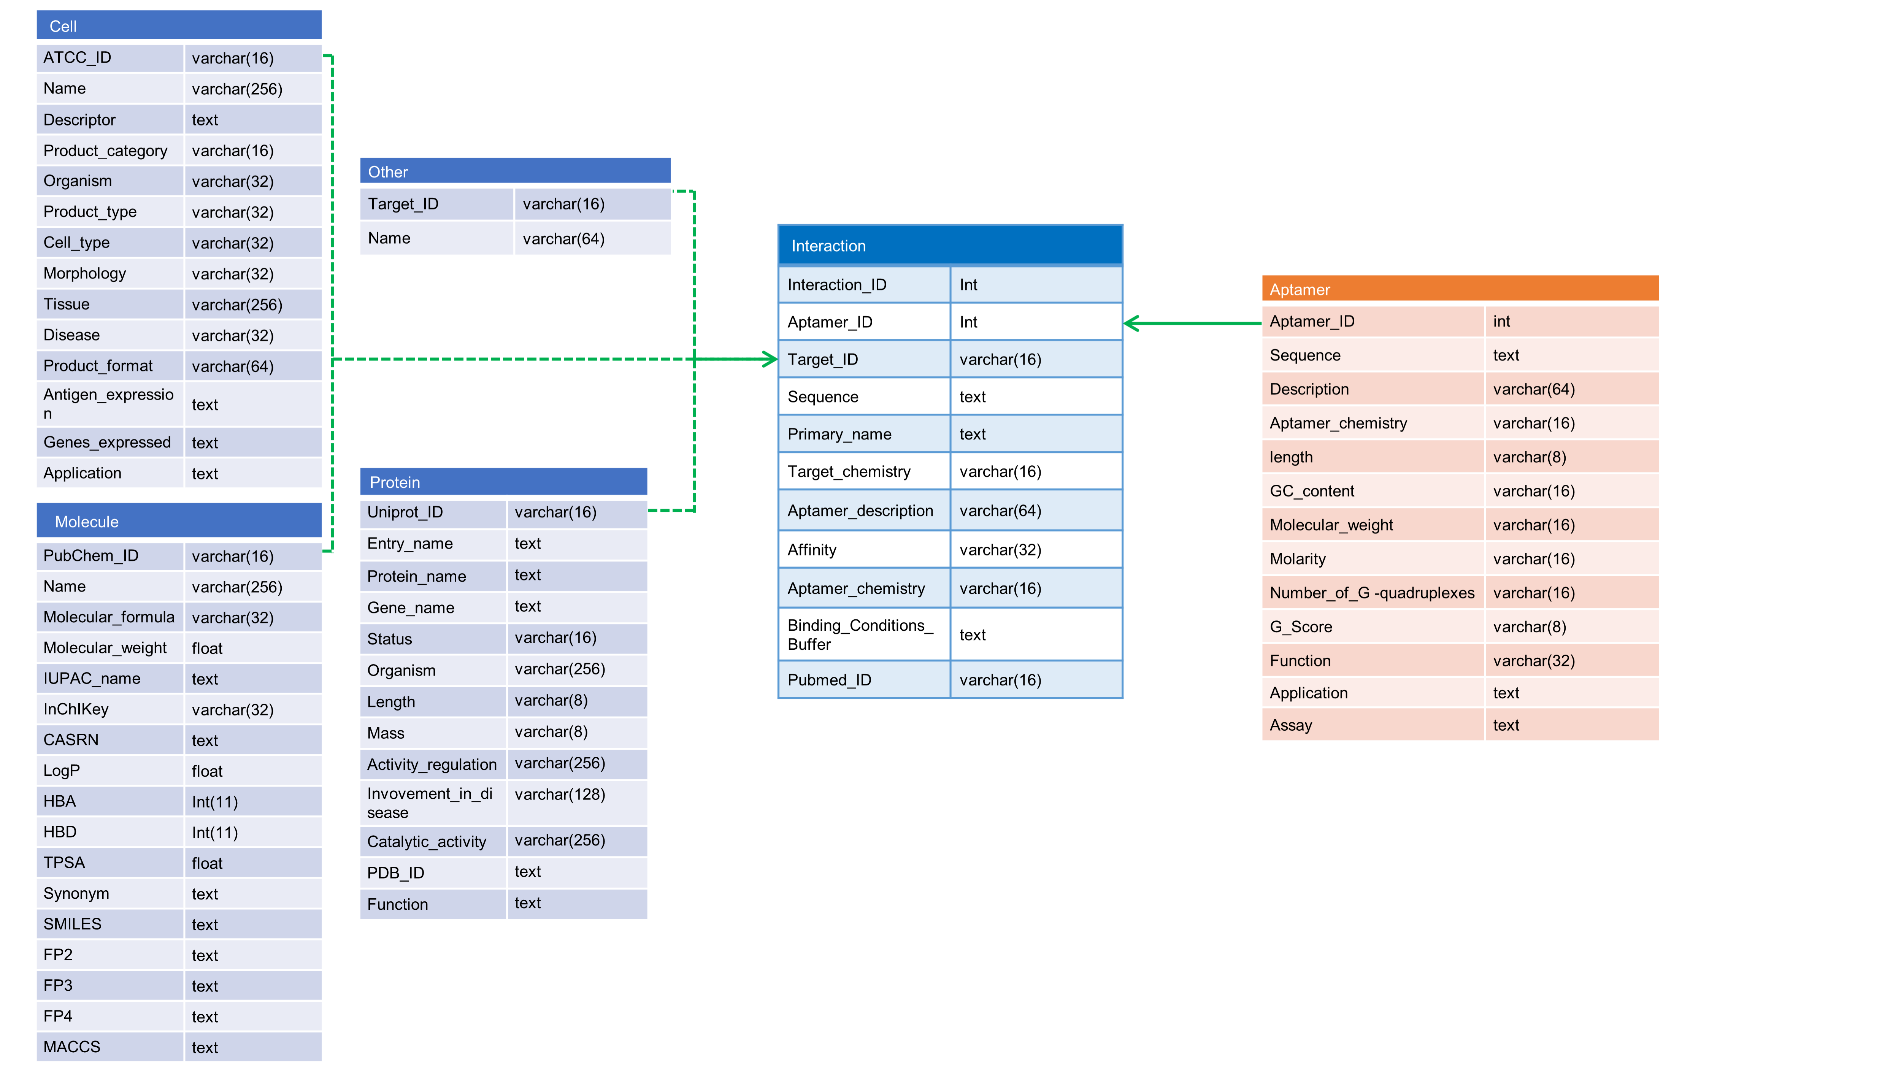


**Fig. S4.** The detailed information of the six tables created in MariaDB.

Supplement: Supplemental_Fig_S4.docx [file Supplemental_Fig_S4.docx]
